# Supplementary material for: Influence of CYP3A4 and CYP3A5 polymorphisms on tacrolimus and sirolimus exposure in stable kidney transplant recipients
Source: publisher site journal article supplement (doi:10.1515/dmpt-2016-0036), 2017-04-30
Supplement: Supplementary file 1 [file Supplementaries_Tables_1_and_2_-_Immunosuppression_data.docx]

**Supplementary Table 1. Immunosuppression data in SRL Group**

| **Variables** | **M4** | **M5** | **M6** | **M9** | **M12** | **M15** | **M18** | **M24** | ***p*** |
| --- | --- | --- | --- | --- | --- | --- | --- | --- | --- |
| N | 24 | 24 | 25 | 24 | 25 | 25 | 25 | 25 |  |
| SRL dose, mg | 3.0±0.4 | 3.0±0.8 | 3.0±0.8 | 2.9±0.9 | 2.8±0.9 | 2.8±1.0 | 2.6±1.0 | 2.7±1.1 | *0.722* |
| SRL concentration, ng/mL | 9.2±3.3 | 7.5±1.9 | 7.4±1.9 | 7.7±1.8 | 7.6±2.5 | 7.1±2.7 | 7.3±3.2 | 7.5±2.9 | *0.167* |
| SRL C/D, ng/mL/mg | 3.0±1.1 | 2.8±1.4 | 2.7±0.9 | 3.0±1.4 | 3.2±1.6 | 3.0±1.6 | 3.2±1.9 | 3.2±1.8 | *0.903* |
| Pred dose, mg | 5.0 | 5.6±3.0 | 5.0 | 5.0 | 5.0 | 5.0 | 5.0 | 5.0 | *0.433* |
| MPS dose, mg | 1411.2±144.0 | 1425.6±72.0 | 1425.6±72.0 | 1396.8±158.3 | 1368.0±207.8 | 1353.6±238.8 | 1368.0±207.8 | 1310.4±272.6 | *0.323* |

Mean ± SD. C/D, dose-adjusted trough blood concentrations; M, month; MPS, mycophenolate sodium; N, number of patients; Pred, prednisone; SD, standard deviation; SRL, sirolimus.

**Supplementary Table 2. Immunosuppression data in TAC Group**

| **Variables** | **M4** | **M5** | **M6** | **M9** | **M12** | **M15** | **M18** | **M24** | ***p*** |
| --- | --- | --- | --- | --- | --- | --- | --- | --- | --- |
| N | 21 | 21 | 21 | 21 | 21 | 21 | 21 | 21 |  |
| TAC dose, mg | 4.4±2.2 | 4.3±2.2 | 4.6±2.7 | 4.4±2.8 | 4.2±2.2 | 4.0±1.5 | 3.9±1.6 | 3.9±1.5 | *0.948* |
| TAC concentration, ng/mL | 5.9±1.9 | 6.2±3.5 | 5.4±1.5 | 5.2±1.8 | 5.6±2.0 | 6.1±2.9 | 5.7±2.2 | 5.4±2.4 | *0.850* |
| TAC C/D, ng/mL/mg | 1.7±1.3 | 1.7±1.1 | 1.6±0.9 | 1.5±0.8 | 1.6±1.0 | 1.8±1.3 | 1.7±0.9 | 1.6±0.9 | *0.971* |
| Pred dose, mg | 5.0 | 5.0 | 5.0 | 5.0 | 5.0 | 5.0 | 5.0 | 5.2±1.1 | *0.433* |
| MPS dose, mg | 1405.7±157.1 | 1405.7±157.1 | 1405.7±157.1 | 1405.7±157.1 | 1405.7±157.1 | 1405.7±157.1 | 1405.7±157.1 | 1405.7±157.1 | *1.000* |

Mean ± SD. C/D, dose-adjusted trough blood concentrations; M, month; MPS, mycophenolate sodium; N, number of patients; Pred, prednisone; SD, standard deviation; TAC, tacrolimus.
