# Supplementary material for: Influence of CYP3A4 and CYP3A5 polymorphisms on tacrolimus and sirolimus exposure in stable kidney transplant recipients
Source: publisher site journal article supplement (doi:10.1515/dmpt-2016-0036), 2017-04-30
Supplement: Supplementary file 2 [file Supplementary_Table_3_-_Genotype_and_Allele_Frequencies.docx]

**Supplementary Table 3. Genotype and allele frequencies in kidney transplant recipients**

| **Polymorphism** | **Genotype**  **or allele** | **SRL**  **Group** | **TAC Group** | ***p1*** | **Total** | ***p2*** |
| --- | --- | --- | --- | --- | --- | --- |
| *CYP3A4*  rs2242480 | GG | 11 (44) | 08 (38.1) |  | 19 (41.3) |  |
| GA | 07 (28) | 10 (47.6) | 0.321 | 17 (37) | 0.116 |
| AA | 07 (28) | 03 (14.3) |  | 10 (21.7) |  |
|  | A | 0.42 | 0.38 |  | 0.40 |  |
| *CYP3A5*  rs15524 | CC | 04 (16) | 01 (4.8) |  | 05 (10.9) |  |
| CT | 07 (28) | 07 (33.3) | 0.472 | 14 (30.4) | 0.152 |
| TT | 14 (56) | 13 (61.9) |  | 27 (58.7) |  |
|  | C | 0.30 | 0.21 |  | 0.26 |  |
| *CYP2C8*  rs10509681 | AA | 20 (80) | 16 (76.2) |  | 36 (78.3) |  |
| AG | 05 (20) | 04 (19) | 0.544 | 09 (19.6) | 0.631 |
| GG | 0 (0) | 01 (4.8) |  | 01 (2.2) |  |
|  | G | 0.10 | 0.14 |  | 0.12 |  |
| *ABCB1*  rs1045642 | CC | 06 (24) | 06 (28.6) |  | 12 (26.1) |  |
| CT | 13 (52) | 11 (52.4) | 0.896 | 24 (52.2) | 0.758 |
| TT | 06 (24) | 04 (19) |  | 10 (21.7) |  |
|  | T | 0.50 | 0.45 |  | 0.48 |  |
| *ABCB1*  rs1128503 | TT | 07 (28) | 03 (14.3) |  | 10 (21.7) |  |
| TC | 09 (36) | 12 (57.1) | 0.317 | 21 (45.7) | 0.606 |
| CC | 09 (36) | 06 (28.6) |  | 15 (32.6) |  |
|  | T | 0.46 | 0.43 |  | 0.45 |  |
| *ABCB1*  rs2032582 | GG | 09 (36) | 07 (33.3) |  | 16 (34.8) |  |
| GT | 12 (48) | 12 (57.1) | 0.515 | 24 (52.2) | 0.316 |
| GA | 0 (0) | 01 (4.8) |  | 01 (2.2) |  |
| TT | 02 (08) | 01 (4.8) |  | 03 (6.5) |  |
| TA | 02 (08) | 0 (0) |  | 02 (4.3) |  |
|  | T | 0.36 | 0.33 |  | 0.35 |  |
|  | A | 0.04 | 0.02 |  | 0.03 |  |
| *ABCC2*  rs717620 | CC | 15 (60) | 12 (57.1) |  | 27 (58.7) |  |
| CT | 09 (36) | 09 (42.9) | 0.609 | 18 (39.1) | 0.309 |
| TT | 01 (04) | 0 (0) |  | 01 (2.2) |  |
|  | T | 0.22 | 0.21 |  | 0.22 |  |
| *ABCC2*  rs3740066 | CC | 10 (40) | 09 (42.9) |  | 19 (41.3) |  |
| CT | 11 (44) | 11 (52.4) | 0.469 | 22 (47.8) | 0.713 |
| TT | 04 (16) | 01 (4.8) |  | 05 (10.9) |  |
|  | T | 0.38 | 0.31 |  | 0.35 |  |
| *UGT2B7*  rs28365063 | AA | 18 (72) | 15 (71.4) |  | 33 (71.7) |  |
| AG | 06 (24) | 06 (28.6) | 0.628 | 12 (26.1) | 0.940 |
| GG | 01 (04) | 0 (0) |  | 01 (2.2) |  |
|  | G | 0.16 | 0.14 |  | 0.15 |  |

Genotype frequencies are presented as N (%) and allelic frequencies as relative numbers. *p*1=*p* value as indicated by χ2 test for comparisons of genotype frequencies between SRL and TAC groups. *p*2=*p* value as indicated by Hardy-Weinberg equilibrium test in total group. SRL, sirolimus; TAC, tacrolimus.
